# Supplementary material for: Facile fabrication of carbon nanotube hollow microspheres as a fiber coating for ultrasensitive solid-phase microextraction of phthalic acid esters in tea beverages
Source: Royal Society of Chemistry journal article supplement (doi:10.1039/d3ay01943h), 2023-12-11

Table 1S GC-MS/MS MRM data acquisition approach for six PAEs.

| Compounds | Retention time (min) | Quantity              |                            | Qualification         |                            |
|-----------|----------------------|-----------------------|----------------------------|-----------------------|----------------------------|
|           |                      | Collision energy (eV) | Monitored transition (m/z) | Collision energy (eV) | Monitored transition (m/z) |
| DEP       | 8.66                 | 24                    | 149.0-65.0                 | 16                    | 149.0-93.0                 |
| DIBP      | 10.42                | 26                    | 149.0-65.0                 | 18                    | 149.0-93.0                 |
| DBP       | 11.20                | 24                    | 149.0-65.0                 | 17                    | 149.0-93.0                 |
| BBP       | 15.32                | 26                    | 149.0-93.0                 | 12                    | 149.0-121.0                |
| DEHP      | 17.63                | 12                    | 149.0-93.0                 | 20                    | 149.0-121.0                |
| DOP       | 20.17                | 15                    | 149.0-93.0                 | 18                    | 149.0-121.0                |

Table 2S Experimental domain and response surface design matrix for the optimization of significant parameters.

|                 | Extraction time (min) | pH  | stirring rate (rpm) |
|-----------------|-----------------------|-----|---------------------|
| Low level (-1)  | 10                    | 3   | 100                 |
| High level (+1) | 60                    | 10  | 1000                |
| Centre (0)      | 35                    | 6.5 | 550                 |
| Experiments     |                       |     |                     |
| 1               | +1                    | 0   | +1                  |
| 2               | +1                    | 0   | -1                  |
| 3               | 0                     | 0   | 0                   |
| 4               | 0                     | +1  | +1                  |
| 5               | -1                    | -1  | 0                   |
| 6               | -1                    | 0   | +1                  |
| 7               | 0                     | -1  | -1                  |
| 8               | +1                    | +1  | 0                   |
| 9               | 0                     | -1  | +1                  |
| 10              | -1                    | 0   | -1                  |
| 11              | +1                    | -1  | 0                   |
| 12              | 0                     | 0   | 0                   |
| 13              | 0                     | 0   | 0                   |
| 14              | -1                    | +1  | 0                   |
| 15              | 0                     | 0   | 0                   |
| 16              | 0                     | +1  | -1                  |
| 17              | 0                     | 0   | 0                   |

Fig 1S Nitrogen sorption isotherm profiles and pore size of MWCNTs-HMs.

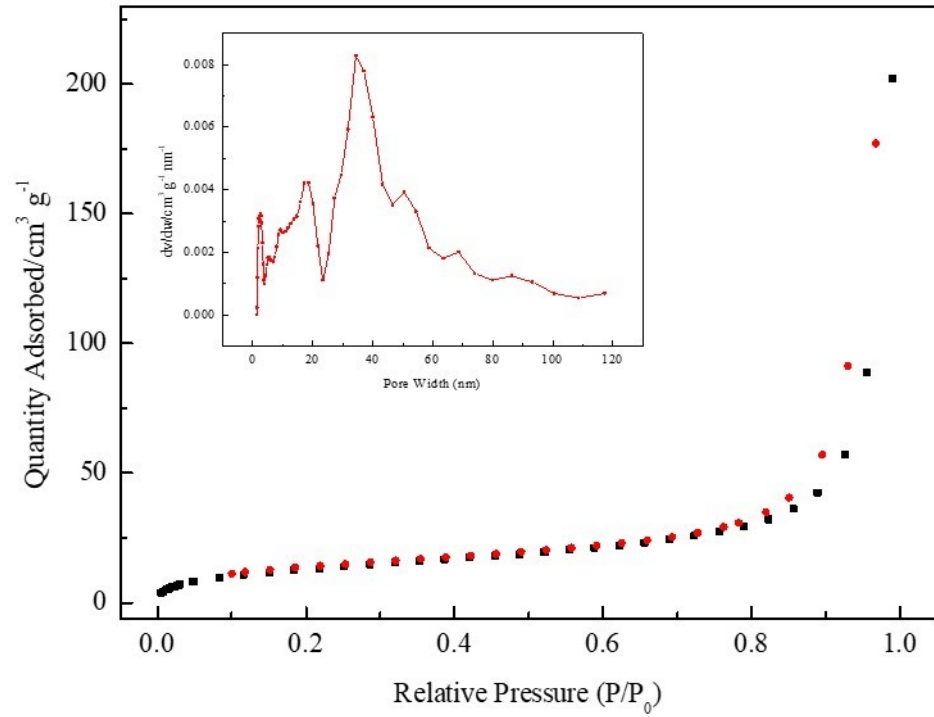

Supplement: d3ay01943h1.pdf [file d3ay01943h1.pdf]
